# Early outcome of early-goal directed therapy for patients with sepsis or septic shock: a systematic review and meta-analysis of randomized controlled trials

Xiaofan Chen<sup>1,2</sup>, Weifeng Zhu<sup>2</sup>, Jing Tan<sup>1</sup>, Heyun Nie<sup>2</sup>, Liangming Liu<sup>3</sup>, Dongmei Yan<sup>2</sup>, Xu Zhou<sup>2</sup> and Xin Sun<sup>1</sup>

<sup>1</sup> Chinese Cochrane Centre, Chinese Evidence-Based Medicine Centre, West China Hospital, Sichuan University, Chengdu, Sichuan, China

<sup>2</sup> Evidence-Based Medicine Research Centre, Jiangxi University of Traditional Chinese Medicine, Nanchang, Jiangxi, China

<sup>3</sup> State Key Laboratory of Trauma, Burns and Combined Injury, Second Department of Research Institute of Surgery, Daping Hospital, Third Military Medical University, Chongqing, China

**Correspondence to:** Xin Sun, **email:** sunx79@hotmail.com

Liangming Liu, **email:** liuliangming0001@126.com

**Keywords:** early-goal directed therapy; sepsis; septic shock; randomized controlled trial; meta-analysis

**Received:** January 21, 2017

**Accepted:** February 13, 2017

**Published:** February 20, 2017

Copyright: Chen et al. This is an open-access article distributed under the terms of the Creative Commons Attribution License (CC-BY), which permits unrestricted use, distribution, and reproduction in any medium, provided the original author and source are credited.

## ABSTRACT

Various trials and meta-analyses have reported conflicting results concerning the application of early goal-directed therapy (EGDT) for sepsis and septic shock. The aim of this study was to update the evidence by performing a systematic review and meta-analysis. Multiple databases were searched from initial through August, 2016 for randomized controlled trials (RCTs) which investigated the associations between the use of EGDT and mortality in patients with sepsis or septic shock. Meta-analysis was performed using random-effects model and heterogeneity was examined through subgroup analyses. The primary outcome of interest was patient all-cause mortality including hospital or ICU mortality. Seventeen RCTs including 6207 participants with 3234 in the EGDT group and 2973 in the control group were eligible for this study. Meta-analysis showed that EGDT did not significantly reduce hospital or intensive care unit (ICU) mortality (relative risk [RR] 0.89, 95% CI 0.78 to 1.02) compared with control group for patients with sepsis or septic shock. The findings of subgroup analyses stratified by study region, number of research center, year of enrollment, clinical setting, sample size, timing of EGDT almost remained constant with that of the primary analysis. Our findings provide evidence that EGDT offers neutral survival effects for patients with sepsis or septic shock. Further meta-analyses based on larger well-designed RCTs or individual patient data meta-analysis are required to explore the survival benefits of EDGT in patients with sepsis or septic shock.

## INTRODUCTION

Severe sepsis and septic shock are one of the commonest life-threatening conditions in critically ill patients with a high mortality rate ranging from 15% to 50% [1, 2]. First reported in 2001 by Rivers et al in a randomized controlled trial (RCT), the mortality rate of severe sepsis and septic shock reduced to a lower level if a specific six-hour resuscitation bundle of early-goal directed therapy (EGDT) was given [3].

Though since 2004, Surviving Sepsis Campaign (SSC) Guidelines has been advocated and updated every four years, it remained to be a big challenge for such patients [4-6]. In the past decade, more and more large-scale RCTs and observational studies have been conducted with controversial results for EGDT [7-17]. Some studies reported survival benefits [10-13, 17] while others, especially some recent RCTs and meta-analysis showed no survival benefits for patients receiving EGDT compared with those with usual care [7-9, 18-20]. We performed this

systematic review aimed at updating the current evidence from RCTs to determine the survival effect of EGDT compared with that of usual care in sepsis and septic shock patients.

## RESULTS

### Description of the included trials

The initial literature search yielded a total of 348 references for eligibility. After excluding the duplicates and further screening the titles or abstracts, 17 trials were identified that met our inclusion criteria (Figure 1) [7-9, 11-17, 21-27].

We presented the baseline characteristics of each included trial concerning study design, participant features,

interventions, and study characteristics in Table 1. In summary, 17 RCTs including 6207 participants with 3234 in the experimental group and 2973 in the control group were enrolled for analysis. The study sample size ranged from 33 to 1600 participants. Seven trials were conducted in USA, 5 in Europe and 5 in Asia. Eight trials recruited participants in multiple centres, while 9 in single centre. As for clinical setting, 11 trials included participants in intensive care units, 4 in emergency department and 2 in both settings. The timing of EGDT were 6-10 hours (hrs) in 11 trials and  $\geq 24$  hrs in 2 trials.

### Early-goal directed therapy and hospital/ICU mortality

A meta-analysis of 17 RCTs including 6207 participants, showed that early-goal directed therapy did

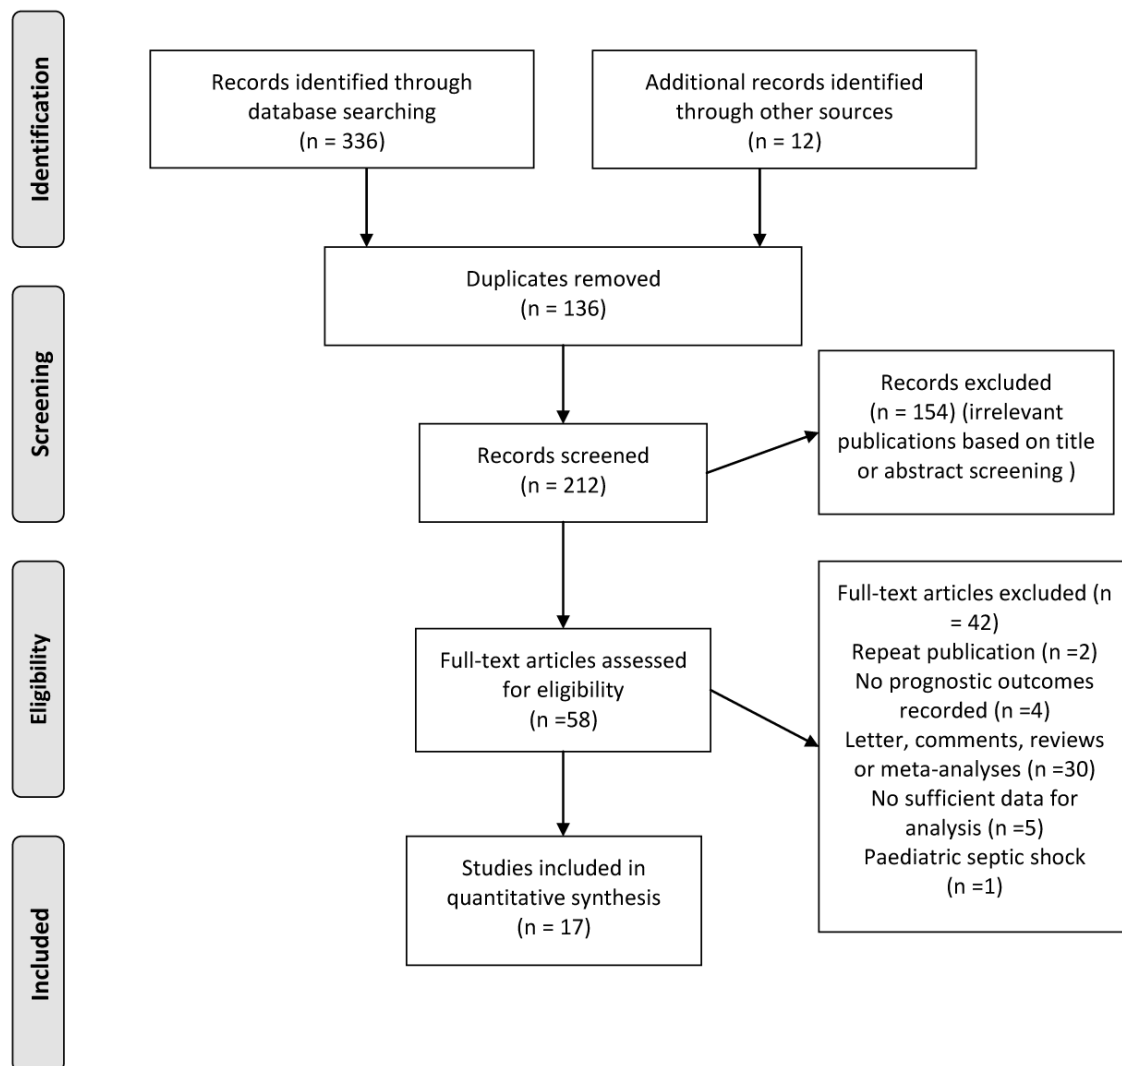

Figure 1: Flow diagram of literature search for trials investigating association between early-goal directed therapy and hospital/ICU mortality for sepsis and septic shock.

**Table 1: Summary characteristics of randomised controlled trials included in systematic review and meta-analysis on early-goal directed therapy and hospital/ICU mortality for sepsis and septic shock.**

| Trial                                             | Year | Country | Single/multiple center | Initiation of enrollment | No. of patients (EGDT/control) | Study population                                   | Clinical setting | Goals in EGDT group                                                                                                                                       | Goals in control group                                                               | Timing of EGDT | Endpoint                                |
|---------------------------------------------------|------|---------|------------------------|--------------------------|--------------------------------|----------------------------------------------------|------------------|-----------------------------------------------------------------------------------------------------------------------------------------------------------|--------------------------------------------------------------------------------------|----------------|-----------------------------------------|
| Tuchschmidt, et al.                               | 1992 | USA     | Single                 | NR                       | 26/25                          | Adult patients with septic shock                   | ICU              | CI>6 L/min/m <sup>2</sup><br>SBP>90 mm Hg                                                                                                                 | CI>3 L/min/m <sup>2</sup><br>SBP>90 mm Hg                                            | 6 hrs          | Hospital mortality                      |
| Yu, et al.                                        | 1993 | USA     | Multicenter            | NR                       | 30/22                          | Adult patients with septic shock                   | ICU              | DO <sub>2</sub> I>600 mL/min/m <sup>2</sup><br>SBP>100 mm Hg                                                                                              | DO <sub>2</sub> I 450–550 mL/min/m <sup>2</sup>                                      | 24 hrs         | 30 days mortality                       |
| Hayes, et al.                                     | 1994 | UK      | Multicenter            | NR                       | 50/50                          | Adult patients with septic shock                   | ICU              | CI>4.5 L/min/m <sup>2</sup><br>DO <sub>2</sub> I>600 mL/min/m <sup>2</sup><br>VO <sub>2</sub> >170 mL/min/m <sup>2</sup>                                  | Usual care                                                                           | Unclear        | Hospital mortality                      |
| Gattinoni, et al.                                 | 1995 | Italy   | Multicenter            | 1991                     | 124/57                         | Adult patients with septic shock                   | ICU              | CI>4.5 L/min/m <sup>2</sup> or SvO <sub>2</sub> >70%<br>MBP>65 mm Hg<br>CVP 8–12 mm Hg<br>UO>0.5 mL/kg/hr                                                 | CI 2.5–3.5 L/min/m <sup>2</sup><br>MBP>65 mm Hg<br>CVP 8–12 mm Hg<br>UO>0.5 mL/kg/hr | Unclear        | 180 days mortality                      |
| Alía, et al.                                      | 1999 | Spain   | Single                 | 1993                     | 31/32                          | Adult patients with septic shock                   | ICU              | DO <sub>2</sub> I>600 mL/min/m <sup>2</sup><br>MBP>60 mm Hg                                                                                               | DO <sub>2</sub> I>330 mL/min/m <sup>2</sup><br>MBP>60 mm Hg                          | Unclear        | ICU mortality                           |
| Rivers, et al.                                    | 2001 | USA     | Single                 | 1997                     | 130/133                        | Adult patients with septic shock                   | ED               | SvO <sub>2</sub> >70%, CVP 8–12 mm Hg, MAP 65–90 mm Hg, UO>0.5 mL/kg/hr                                                                                   | CVP 8–12 mm Hg<br>MBP 65–90 mm Hg<br>UO>0.5 mL/kg/hr                                 | 6 hrs          | Hospital mortality                      |
| Lin, et al.                                       | 2006 | Taiwan  | Single                 | 2003                     | 108/116                        | Adult patients with septic shock                   | ICU              | CVP 8–12 mm Hg, MAP>65 mm Hg, UO>0.5 mL/kg/hr                                                                                                             | Usual care                                                                           | 6 hrs          | Hospital mortality                      |
| Wang, et al.                                      | 2006 | China   | Single                 | 2004                     | 16/17                          | Adult patients with septic shock                   | ICU              | CVP 8–12 mm Hg, MAP>65 mm Hg, ScvO <sub>2</sub> >70%, UO>0.5 mL/kg/hr                                                                                     | Usual care                                                                           | 6–10 hrs       | Hospital mortality (7 days and 14 days) |
| Jones, et al.                                     | 2010 | USA     | Multicenter            | 2007                     | 150/150                        | Adult patients with septic shock                   | ED               | ScvO <sub>2</sub> >70%, CVP 8–12 mm Hg, MAP 65–90 mm Hg, UO>0.5 mL/kg/hr                                                                                  | Lactate clearance<br>CVP>8 mm Hg<br>MBP>65 mm Hg                                     | Unclear        | Hospital mortality                      |
| The EDGT Collaborative Group of Zhejiang Province | 2010 | China   | Multicenter            | 2005                     | 163/151                        | Adult patients with severe sepsis and septic shock | ICU              | CVP 8–12 mm Hg, MAP>65 mm Hg, SBP>90mmHg, UO>0.5 mL/kg/hr, ScvO <sub>2</sub> >70%                                                                         | CVP 8–12 mm Hg, MAP>65 mm Hg, SBP>90mmHg, UO>0.5 mL/kg/hr                            | 6 hrs          | Hospital mortality (28 days)            |
| Tian, et al.                                      | 2012 | China   | Single                 | 2009                     | 43/19                          | Adult patients with septic shock                   | ICU              | CVP 8–12 mm Hg, MAP>65 mm Hg, ScvO <sub>2</sub> >70%, UO>0.5 mL/kg/hr, 6 h LCR>10% or 30%                                                                 | CVP 8–12 mm Hg, MAP>65 mm Hg, ScvO <sub>2</sub> >70%, UO>0.5 mL/kg/hr                | 6 hrs          | Hospital mortality (7 days and 28 days) |
| Yu, et al.                                        | 2013 | China   | Single                 | 2011                     | 25/25                          | Adult patients with severe sepsis and septic shock | ICU              | CVP≥8mmHg, MAP≥65mmHg, LCR≥10%                                                                                                                            | CVP≥8mmHg, MAP≥65mmHg, ScvO <sub>2</sub> ≥0.70                                       | 6 hrs          | Hospital mortality (28 days)            |
| Andrews, et al.                                   | 2014 | USA     | Single                 | 2012                     | 53/56                          | Adult patients with septic shock                   | ED ward ICU      | Simplified Severe Sepsis Protocol: Hb>7 initial 2 L bolus of NS (within 1 hr), if, CVP<3 mm Hg; 2 L loading MAP>65 mm Hg, dopamine infusion 10 mcg/kg/min | ScvO <sub>2</sub> ≥0.70                                                              | 6 hrs          | Hospital mortality                      |

|            |      |                          |             |      |         |                                  |        |                                                                          |                                                                       |        |                    |
|------------|------|--------------------------|-------------|------|---------|----------------------------------|--------|--------------------------------------------------------------------------|-----------------------------------------------------------------------|--------|--------------------|
| ARiSe      | 2014 | Australia or New Zealand | Multicenter | 2008 | 796/804 | Adult patients with septic shock | ED     | ScvO <sub>2</sub> >70%, CVP 8–12 mm Hg, MAP 65–90 mm Hg, UO>0.5 mL/kg/hr | Usual care                                                            | 6 hrs  | 90 days mortality  |
| ProCESS    | 2014 | USA                      | Multicenter | 2008 | 439/456 | Adult patients with septic shock | ED     | ScvO <sub>2</sub> >70%, CVP 8–12 mm Hg, MAP 65–90 mm Hg, UO>0.5 mL/kg/hr | Usual care                                                            | 6 hrs  | 60 days mortality  |
| Lu, et al. | 2014 | China                    | Single      | 2009 | 42/40   | Adult patients with septic shock | ICU    | ITBVI 850-1500 mL/m <sup>2</sup> , MAP≥65 mmHg                           | CVP 8–12 mm Hg, MAP>65 mm Hg, ScvO <sub>2</sub> >70%, UO>0.5 mL/kg/hr | 72 hrs | Hospital mortality |
| ProMiSe    | 2015 | UK                       | Multicenter | 2012 | 623/620 | Adult patients with septic shock | ED ICU | ScvO <sub>2</sub> >70%, CVP 8–12 mm Hg, MAP 65–90 mm Hg, UO>0.5 mL/kg/hr | Usual care                                                            | 6 hrs  | 90 days mortality  |

Abbreviations: CI, cardiac output; CVP central venous pressure; ED emergency department; DO<sub>2</sub>I, oxygen delivery index; EGDT, early-goal directed therapy; hr, hour; ICU, intensive care unit; LCR, lactate clearance rate; ITBVI, intrathoracic blood volume index; MAP, mean arterial pressure; ScvO<sub>2</sub>, central venous oxygen saturation; UO, urine output.

not significantly reduce hospital/ICU mortality (relative risk [RR] 0.89, 95% CI 0.78 to 1.02) compared with control group for patients with sepsis or septic shock (Figure 2), with significantly heterogeneous ( $I^2 = 56.6\%$ )

among trials. The findings of subgroup analyses stratified by trial region, number of research center, year of enrollment, clinical setting, sample size, timing of EGDT almost remained constant with that of the main analysis,

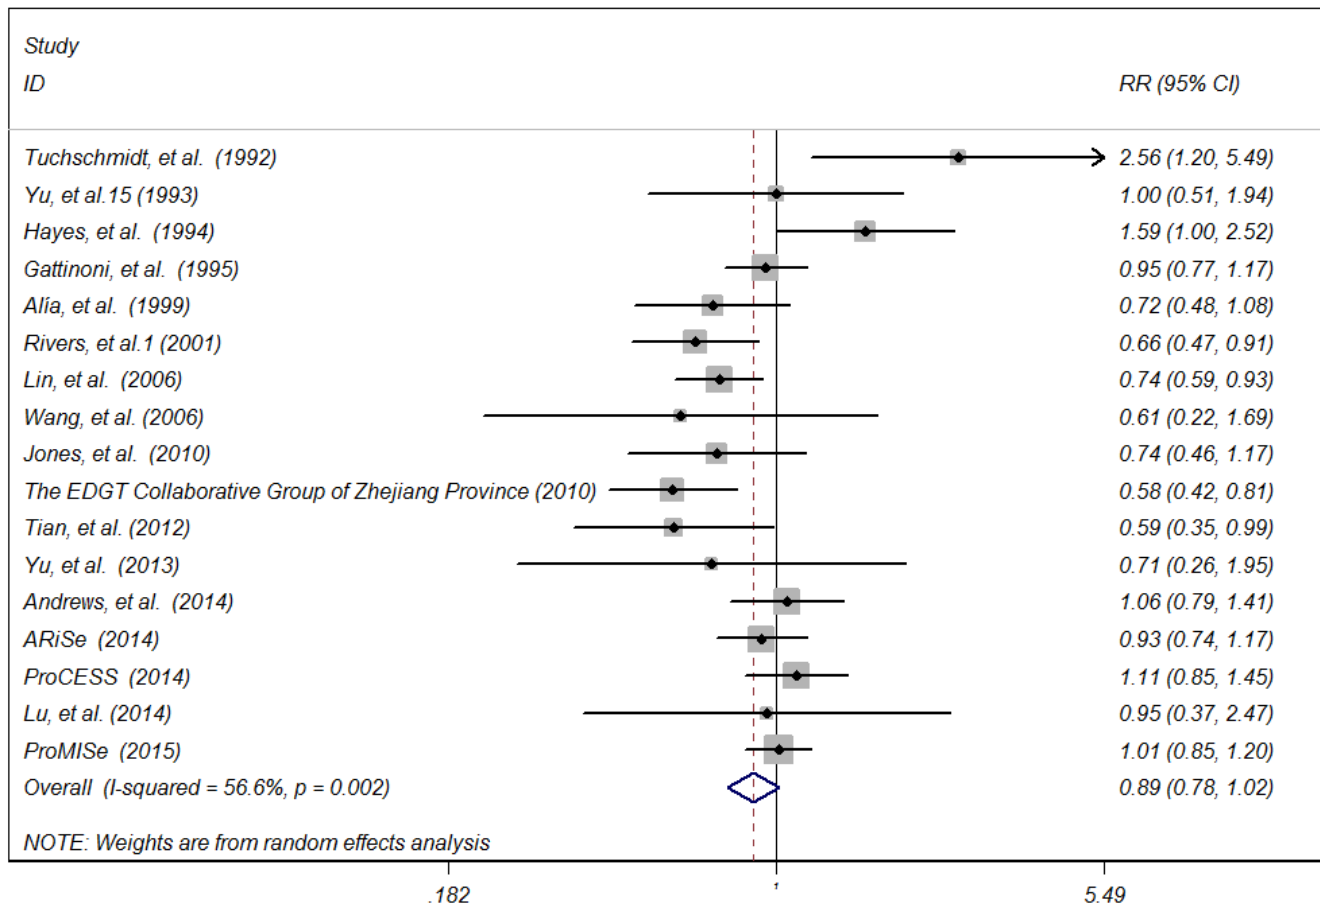

**Figure 2: Forest plot of randomised controlled trials of early-goal directed therapy and hospital/ICU mortality for sepsis and septic shock.** Weights from random effects analysis.

**Table 2: Subgroup analyses for relative risk of hospital/ICU mortality for patients with sepsis and septic shock receiving early-goal directed therapy compared with those with usual care.**

| Comparison variables | Hospital/ICU mortality                           |                     |                          |
|----------------------|--------------------------------------------------|---------------------|--------------------------|
|                      | (I <sup>2</sup> statistics %; P <sub>het</sub> ) | RR 95% CI           | P <sub>interaction</sub> |
| Total                | 17(56.6; 0.002)                                  | 0.89 (0.78 to 1.02) | NA                       |
| Trial region         |                                                  |                     | 0.004                    |
| USA                  | 7 (58.1, 0.026)                                  | 0.98 (0.76 to 1.27) |                          |
| Europe               | 5 (41.8, 0.143)                                  | 0.98 (0.84 to 1.14) |                          |
| Asia                 | 5 (0, 0.775)                                     | 0.68 (0.57 to 0.80) |                          |
| Research center      |                                                  |                     | 0.005                    |
| Single-centered      | 9 (51.0, 0.038)                                  | 0.82 (0.65 to 1.02) |                          |
| Multiple-centered    | 8 (56.4, 0.025)                                  | 0.95 (0.81 to 1.11) |                          |
| Year of enrollment   |                                                  |                     | 0.066                    |
| ~2000                | 3 (49.3, 0.139)                                  | 0.79 (0.62 to 1.02) |                          |
| 2000-2010            | 8 (48.4, 0.059)                                  | 0.79 (0.67 to 0.97) |                          |
| 2010~                | 3 (0, 0.701)                                     | 1.07 (0.88 to 1.30) |                          |
| Clinical setting     |                                                  |                     | 0.037                    |
| Intensive care unit  | 11 (61.3, 0.004)                                 | 0.87 (0.69 to 1.08) |                          |
| Emergency department | 4 (55.5, 0.080)                                  | 0.87 (0.69 to 1.09) |                          |
| Combined             | 2 (0, 0.796)                                     | 1.02 (0.88 to 1.19) |                          |
| Sample size          |                                                  |                     | 0.923                    |
| ≤100                 | 8 (60.6, 0.013)                                  | 0.97 (0.67 to 1.40) |                          |
| >100                 | 9 (58.2, 0.014)                                  | 0.87 (0.76 to 1.00) |                          |
| Timing of EGDT       |                                                  |                     | 0.40                     |
| 6-10 hrs             | 11 (65.3, 0.001)                                 | 0.87 (0.73 to 1.03) |                          |
| ≥24 hrs              | 2 (0, 0.937)                                     | 0.98 (0.57 to 1.69) |                          |

Abbreviations: CI, confidence interval; EGDT, early-goal directed therapy; het, heterogeneity; hrs, hours; ICU, intensive care unit; RR, relative risk; NA, not available.

except that for trials conducted in Asian countries, patients treated with early-goal directed therapy had significant reduced hospital/ICU mortality (RR 0.68, 95% CI 0.57 to 0.80) compared with those in control group. A borderline effect was noted for trials with sample size more than 100 (RR 0.87, 95% CI 0.76 to 1.00).

### Trial center

Nine and eight trials were conducted in single center and multiple centers, respectively. The summary RRs estimated for hospital or ICU mortality were 0.82 (95% CI 0.65 to 1.02) for single center and 0.95 (95% CI 0.81 to 1.11) for multiple centers. Statistically significant difference for inter-study heterogeneity ( $P = 0.005$ ) was noted.

### Year of enrollment

Three trials were performed before year 2000, with the summary RRs for hospital or ICU mortality of 0.79 (95% CI 0.62 to 1.02). Eight and three trials were performed between year 2000-2010 and after year 2010,

with the summary RRs for hospital or ICU mortality of 0.79 (95% CI 0.67 to 0.97) and 1.07 (95% CI 0.88 to 1.30), respectively. There was no significant difference for inter-study heterogeneity ( $P = 0.055$ ).

### Sample size

The pooled RRs for hospital or ICU mortality stratified by sample size were 0.87 (95% CI 0.76 to 1.00) for trials with large sample size (>100) and 0.97 (95% CI 0.67 to 1.40) for trials with small sample size (≤100). We found statistically significant difference for inter-study heterogeneity ( $P = 0.923$ ).

### Trial region

Seven trials were conducted in USA, and another 7 and 5 studies were in Europe and Asia, respectively. The pooled RRs for hospital or ICU mortality were 0.98 (95% CI 0.76 to 1.27) for trials conducted in USA, 0.98 (95% CI 0.84 to 1.14) in Europe and 0.68 (95% CI 0.57 to 0.80) in Asia. Statistically significant difference for inter-study heterogeneity ( $P = 0.004$ ) was noted.

## Inclusion period

Eleven trials enrolled patients in intensive care unit, with a pooled RR of 0.87 (95% CI 0.69 to 1.08); 4 included patients in emergency department with the pooled RR of 0.87 (95% CI 0.69 to 1.09) and two trials enrolled patients in the combined units of both intensive care unit and emergency department, with the summary RR of 1.02 (95% CI 0.88 to 1.19). We found statistically significant difference for inter-study heterogeneity ( $P = 0.037$ ).

## Timing of EGDT

The summarised RRs for hospital or ICU mortality stratified by timing of EGDT were 0.87 (95% CI 0.73 to 1.03) for trials with patients having EGDT in 6-10 hours and 0.98 (95% CI 0.57 to 1.69) for trials with patients having EGDT after 24 hours. There was no statistically significant difference for heterogeneity among trials ( $P = 0.40$ ).

## Publication bias

There was no significant funnel plot asymmetry as was shown in Figure 3. Symmetrical distribution of the trials on the funnel plot indicates no publication bias. Egger's regression intercept was 0.33 ( $P = 0.74$ ) further

suggesting no publication bias. Sensitivity analysis using Duval and Tweedie's trim and fill method suggested that no missing trial was imputed and the adjusted estimate was the same as the primary analysis, confirming the robustness of the analysis.

## DISCUSSION

This systematic review and meta-analysis involving the available RCTs on the impact of EGDT on hospital or ICU mortality for patients with sepsis and septic shock did not show a significant reduced risk of hospital/ICU all-cause mortality associated with the use of EGDT. Meanwhile, the findings were independent of trial region, number of research center, year of enrollment, clinical setting, sample size or timing of EGDT.

Several factors contribute to the development of sepsis or septic shock. Inflammatory mediators may lead to microcirculatory disturbance [28], and subsequent reduced perfusion and hypoxia could occur [29]. The primary goal of fluid resuscitation in sepsis or septic shock is to preserve effective circulatory blood volume, restore sufficient tissue perfusion, and sustain a balanced body oxygen uptake. The commonly used indicators in clinics for patients with sepsis or septic shock include mean arterial pressure (MAP), central venous pressure (CVP) and superior vena cava oxygenation saturation (ScvO<sub>2</sub>)/mixed venous oxygen saturation (SvO<sub>2</sub>), which are suggested indicators for maintain the balance of volume

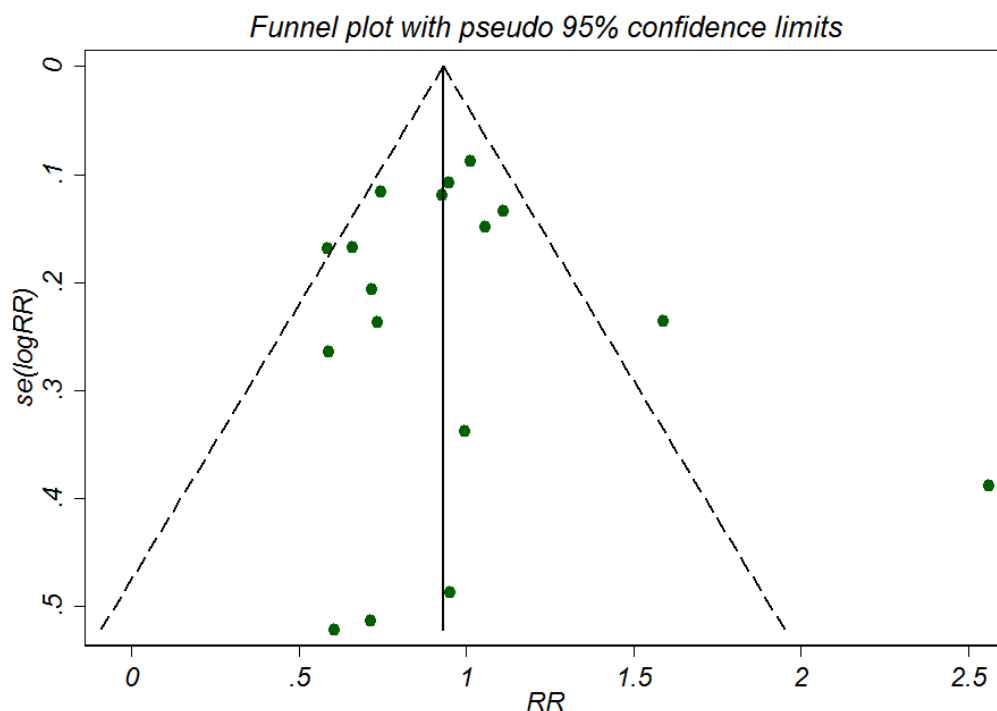

**Figure 3: Funnel plot for the outcome of hospital/ICU mortality.** The tests for funnel plot asymmetry by Egger's test identified no publication bias (Egger's test,  $P = 0.74$ ).



homeostasis based on the EGDT criteria. The perfusion condition of tissue or organs, mainly indicated by CVP or MAP, could guide physicians' decisions on the adjustment for the dosage of vasoactive agents accordingly. Besides, ScvO<sub>2</sub> being more than 70% was also suggested a good indicator for the balance of supply and consumption of oxygen. It has been reported that the balance of oxygen supply plays a pivotal role for the mortality of patients with sepsis or septic shock. Moreover, several clinical trials provided evidence that implementing EGDT was significantly associated with reduced mortality in patients with sepsis or septic shock compared with those using conventional therapy [11-13, 17].

This meta-analysis combined evidence from 17 RCTs and focused on whether the application of EGDT with the indicators such as CVP, MAP, ScvO<sub>2</sub> or SvO<sub>2</sub> and Urine Output (UO) has the potential to reduce short-term mortality in patients with sepsis or septic shock. To the best of our knowledge, this study has the largest sample size of over 6200 participants compared with those published in recent years and obtain consistent neutral results with several meta-analyses.

We acknowledge that this meta-analysis should be interpreted with multiple limitations. Firstly, due to the broaden of our inclusion criteria with a total of 17 RCTs finally included, the heterogeneity of the pooled estimate was predictably significant ( $I^2 = 56.2\%$ ) for the feature of trial population (patient age, disease severity and baseline health status), intervention treatment in trial group and in comparisons (difference in goals of EDGT protocol), outcome measurement (6h mortality, 24h mortality, etc.) and methodology quality (differenc in study design of RCTs), which we had investigated in subgroup analyses as presented in Table 2. Though the finding provided neither benefits nor harm of EGDT, we still could not conclude that EGDT was of no use for sepsis or septic shock, at least it was no bad than usual care. Secondly, we chose 6h or 24h mortality as study endpoints, which may have a potential impact on the combined estimates. However, we conducted subgroup analysis based on different mortality time interval with consistent findings. Thirdly, due to the unavailablity of detailed information of each trial, some baseline features about patients conditions could not be abstracted to conduct sensitivity analysis. Moreover, though subgroup analyses had been conducted, still some of the causes of heterogeneity could not be found. We proposed that other potential sources of heterogeneity could lie in the characteristics of the enrolled populations such as the baseline disease status and treatment protocol.

The present analysis has several strengths. Firstly, we performed an exhaustive literature search to identify all potential relevant trials from the main databases and the original authors of some of the trials were contacted *via* email and to have some additional data for analyses if possible, which have minimized the potential risk of publication bias. Though unpublished grey literature

were not searched for insufficient data, the included trials cover countries from all over the European, American and Asian counties. Secondly, compared with meta-analysis of observational studies, the current study included only RCTs, providing direct evidence for the effect of EGDT on survival of patients with sepsis or septic shock. Thirdly, to explore the robustness of the findings, we applied sensitivity analysis through trim and filled method, and the consistent finding with the primary one was indicated. We proposed that for future trial design, larger number of patients with the same disease stage or severity should be enrolled to increase the statistical power.

In summary, current evidence from RCTs shows that EGDT adds no survival benefit or harm to patients with sepsis or septic shock. Further meta-analyses based on high-level RCTs or individual patient data meta-analysis are required to explore the survival benefits of EDGT in patients with sepsis or septic shock.

## MATERIALS AND METHODS

### Literature search and study selection

We conducted this systematic literature review according to the Preferred reporting items for systematic reviews and meta-analyses (PRISMA) statement [30]. A literature search of Pubmed, EMBASE and the Cochrane Library Central Register of Controlled Trials databases were searched from inception till August, 2016 for relevant citations, using search strategies (supplementary Search Strategy) in combination with exploded MeSH terms and text words concerning sepsis/septicaemia/septic shock, goal directed therapy/goal directed resuscitation/EGDT/GDT. Manual reference search from the primary selected reference lists was also performed for additional potential publications.

Trials were considered eligible for inclusion if they satisfied the following criteria elements (Participants, Intervention, Comparison, Outcome, Study design):

(1) Participants: Adult patients with severe sepsis and septic shock, treating with EGDT methods;

(2) Intervention: We used the standard EGDT, which was defined as a protocol resuscitation in accord with achieving specific therapeutic results in terms of CVP (8-12mmHg), MAP (65-90mmHg), UO ( $\geq 0.5\text{ml/kg/h}$ ), and continuous monitoring to keep ScvO<sub>2</sub> ( $\geq 70\%$ ).

(3) Comparison: Usual care or other protocols were adopted in the control group based on the included trials.

(4) Outcome: We set the primary outcome measure as all-cause mortality at the early period for patient treatment during hospitalization (hospital or ICU mortality). All-cause mortality was defined as the time from the trial randomization to death from any cause.

(5) Trial design: RCTs published with full texts and

in peer-review journals without language restrictions. We excluded those non-RCTs or conference abstracts due to the high risk of bias.

### Data extraction and bias assessment

Two investigators (X.C. and W.Z.) independently screened, identified the citations and extracted baseline characteristics and evaluated the bias of each study from the selected trials. Any discrepancies were resolved through discussion with a third senior investigator (X.S or L.L.) until a consensus was reached. The characteristics abstracted were trial author, publication year, research country, number of trial center, initiation of enrollment, number of patients in trial group and control group, trial population, clinical setting, goals in trial group and in control group, timing of EGDT and trial endpoints.

The Cochrane Collaboration risk of bias tool was used to assess methodological quality of each trial according to the seven domains including adequacy of sequence generation, allocation concealment, blinding of participants, blinding for outcome assessment, incomplete outcome data, selective outcome reporting and other potential sources of bias [31].

### Statistical analysis

We conducted meta-analysis using the software STATA version 12.0 (StataCorp LP, College Station, TX). We set hospital mortality or ICU mortality as the primary outcome measure. For dichotomous data, we calculated the RR with 95% CI to assess the treatment effect and pooled using random-effects model [32] due to the proposed high between-trial variation. Inter-trial heterogeneity was examined using  $I^2$  statistics with an  $I^2$  value of more than 50% indicating significant heterogeneity [33]. Between-study heterogeneity were examined using subgroup analyses by stratifying study baseline characteristics such as trial region, number of research center, year of enrollment, clinical setting, sample size, timing of EGDT. Publication bias was tested by visual inspection of funnel plot asymmetry combined with Egger's test for statistical significance [34]. Duval and Tweedie's trim and fill method was also applied to further assess the robustness of the summary estimates [35].

### CONFLICTS OF INTEREST

The authors declare no potential conflicts of interest.

### FINANCIAL SUPPORT

This research was supported by the Foundation of the Health and Family Planning Commission Research Project of Jiangxi Province (grant no. 530096).

## REFERENCES

1. Yealy DM, Kellum JA, Huang DT, Barnato AE, Weissfeld LA, Pike F, Terndrup T, Wang HE, Hou PC, LoVecchio F, Filbin MR, Shapiro NI, Angus DC, et al. A randomized trial of protocol-based care for early septic shock. *N Engl J Med.* 2014; 370:1683–93.
2. Quenot JP, Binquet C, Kara F, Martinet O, Ganster F, Navellou JC, Castelain V, Barraud D, Cousson J, Louis G, Perez P, Kuteifan K, Noirot A, et al. The epidemiology of septic shock in French intensive care units: the prospective multicenter cohort EPISS study. *Crit Care.* 2013; 17:R65.
3. Rivers E, Nguyen B, Havstad S, Ressler J, Muzzin A, Knoblich B, Peterson E, Tomlanovich M, and Early Goal-Directed Therapy Collaborative Group. Early goal-directed therapy in the treatment of severe sepsis and septic shock. *N Engl J Med.* 2001; 345:1368–77.
4. Dellinger RP, Levy MM, Rhodes A, Annane D, Gerlach H, Opal SM, Sevransky JE, Sprung CL, Douglas IS, Jaeschke R, Osborn TM, Nunnally ME, Townsend SR, et al. Surviving Sepsis Campaign: international guidelines for management of severe sepsis and septic shock, 2012. *Intensive Care Med.* 2013; 39:165–228.
5. Dellinger RP, Levy MM, Carlet JM, Bion J, Parker MM, Jaeschke R, Reinhart K, Angus DC, Brun-Buisson C, Beale R, Calandra T, Dhainaut JF, Gerlach H, et al. Surviving Sepsis Campaign: international guidelines for management of severe sepsis and septic shock: 2008. *Crit Care Med.* 2008; 36:296–327.
6. Dellinger RP, Carlet JM, Masur H, Gerlach H, Calandra T, Cohen J, Gea-Banacloche J, Keh D, Marshall JC, Parker MM, Ramsay G, Zimmerman JL, Vincent JL, et al. Surviving Sepsis Campaign guidelines for management of severe sepsis and septic shock. *Intensive Care Med.* 2004; 30:536–55.
7. Mouncey PR, Osborn TM, Power GS, Harrison DA, Sadique MZ, Grieve RD, Jahan R, Harvey SE, Bell D, Bion JF, Coats TJ, Singer M, Young JD, et al. Trial of early, goal-directed resuscitation for septic shock. *N Engl J Med.* 2015; 372:1301–11.
8. Yealy DM, Kellum JA, Huang DT, Barnato AE, Weissfeld LA, Pike F, Terndrup T, Wang HE, Hou PC, LoVecchio F, Filbin MR, Shapiro NI, Angus DC, et al. A randomized trial of protocol-based care for early septic shock. *N Engl J Med.* 2014; 370:1683–93.
9. Peake SL, Delaney A, Bailey M, Bellomo R, Cameron PA, Cooper DJ, Higgins AM, Holdgate A, Howe BD, Webb SA, Williams PARISE Investigators, and ANZICS Clinical Trials Group. Goal-directed resuscitation for patients with early septic shock. *N Engl J Med.* 2014; 371:1496–506.
10. de Oliveira CF, de Oliveira DS, Gottschald AF, Moura JD, Costa GA, Ventura AC, Fernandes JC, Vaz FA, Carcillo JA, Rivers EP, Troster EJ. ACCM/PALS haemodynamic support guidelines for paediatric septic shock: an outcomes comparison with and without monitoring central venous



- oxygen saturation. *Intensive Care Med.* 2008; 34:1065–75.
11. Wang XZ, Lü CJ, Gao FQ, Li XH, Yan WF, Ning FY. Efficacy of goal-directed therapy in the treatment of septic shock. [Article in Chinese] *Zhongguo Wei Zhong Bing Ji Jiu Yi Xue.* 2006; 18:661–64.
  12. Lin SM, Huang CD, Lin HC, Liu CY, Wang CH, Kuo HP. A modified goal-directed protocol improves clinical outcomes in intensive care unit patients with septic shock: a randomized controlled trial. *Shock.* 2006; 26:551–57.
  13. Rivers E, Nguyen B, Havstad S, Ressler J, Muzzin A, Knoblich B, Peterson E, Tomlanovich M, and Early Goal-Directed Therapy Collaborative Group. Early goal-directed therapy in the treatment of severe sepsis and septic shock. *N Engl J Med.* 2001; 345:1368–77.
  14. Alía I, Esteban A, Gordo F, Lorente JA, Diaz C, Rodriguez JA, Frutos F. A randomized and controlled trial of the effect of treatment aimed at maximizing oxygen delivery in patients with severe sepsis or septic shock. *Chest.* 1999; 115:453–61.
  15. Gattinoni L, Brazzi L, Pelosi P, Latini R, Tognoni G, Pesenti A, Fumagalli R. A trial of goal-oriented hemodynamic therapy in critically ill patients. SvO2 Collaborative Group. *N Engl J Med.* 1995; 333:1025–32.
  16. Hayes MA, Timmins AC, Yau EH, Palazzo M, Hinds CJ, Watson D. Elevation of systemic oxygen delivery in the treatment of critically ill patients. *N Engl J Med.* 1994; 330:1717–22.
  17. Early Goal-Directed Therapy Collaborative Group of Zhejiang Province. [The effect of early goal-directed therapy on treatment of critical patients with severe sepsis/ septic shock: a multi-center, prospective, randomized, controlled study]. *Zhongguo Wei Zhong Bing Ji Jiu Yi Xue.* 2010; 22:331–34.
  18. Yu H, Chi D, Wang S, Liu B. Effect of early goal-directed therapy on mortality in patients with severe sepsis or septic shock: a meta-analysis of randomised controlled trials. *BMJ Open.* 2016; 6:e008330.
  19. Xu JY, Chen QH, Liu SQ, Pan C, Xu XP, Han JB, Xie JF, Huang YZ, Guo FM, Yang Y, Qiu HB. The Effect of Early Goal-Directed Therapy on Outcome in Adult Severe Sepsis and Septic Shock Patients: A Meta-Analysis of Randomized Clinical Trials. *Anesth Analg.* 2016; 123:371–81.
  20. Lee WK, Kim HY, Lee J, Koh SO, Kim JM, Na S. Protocol-Based Resuscitation for Septic Shock: A Meta-Analysis of Randomized Trials and Observational Studies. *Yonsei Med J.* 2016; 57:1260–70.
  21. Lu N, Zheng R, Lin H, Shao J, Yu J. Clinical studies of surviving sepsis bundles according to PiCCO on septic shock patients. [Article in Chinese] *Zhonghua Wei Zhong Bing Ji Jiu Yi Xue.* 2014; 26:23–27.
  22. Andrews B, Muchemwa L, Kelly P, Lakhi S, Heimburger DC, Bernard GR. Simplified severe sepsis protocol: a randomized controlled trial of modified early goal-directed therapy in Zambia. *Crit Care Med.* 2014; 42:2315–24.
  23. Yu B, Tian HY, Hu ZJ, Zhao C, Liu LX, Zhang Y, Zhu GJ, Wang LT, Wu XH, Li J. Comparison of the effect of fluid resuscitation as guided either by lactate clearance rate or by central venous oxygen saturation in patients with sepsis. [Article in Chinese] *Zhonghua Wei Zhong Bing Ji Jiu Yi Xue.* 2013; 25:578–83.
  24. Tian HH, Han SS, Lv CJ, Wang T, Li Z, Hao D, Shang QM, Wang XZ. The effect of early goal lactate clearance rate on the outcome of septic shock patients with severe pneumonia. [Article in Chinese] *Zhongguo Wei Zhong Bing Ji Jiu Yi Xue.* 2012; 24:42–45.
  25. Jones AE, Shapiro NI, Trzeciak S, Arnold RC, Claremont HA, Kline JA, and Emergency Medicine Shock Research Network (EMShockNet) Investigators. Lactate clearance vs central venous oxygen saturation as goals of early sepsis therapy: a randomized clinical trial. *JAMA.* 2010; 303:739–46.
  26. Yu M, Levy MM, Smith P, Takiguchi SA, Miyasaki A, Myers SA, and YU M. Effect of maximizing oxygen delivery on morbidity and mortality rates in critically ill patients: a prospective, randomized, controlled study. *Crit Care Med.* 1993; 21:830–38.
  27. Tuschmidt J, Fried J, Astiz M, Rackow E. Elevation of cardiac output and oxygen delivery improves outcome in septic shock. *Chest.* 1992; 102:216–20.
  28. Rosário AL, Park M, Brunialti MK, Mendes M, Rapozo M, Fernandes D, Salomão R, Laurindo FR, Schettino GP, Azevedo LC. SvO(2)-guided resuscitation for experimental septic shock: effects of fluid infusion and dobutamine on hemodynamics, inflammatory response, and cardiovascular oxidative stress. *Shock.* 2011; 36:604–12.
  29. Angus DC, van der Poll T. Severe sepsis and septic shock. *N Engl J Med.* 2013; 369:2063.
  30. Liberati A, Altman DG, Tetzlaff J, Mulrow C, Gøtzsche PC, Ioannidis JP, Clarke M, Devereaux PJ, Kleijnen J, Moher D. The PRISMA statement for reporting systematic reviews and meta-analyses of studies that evaluate health care interventions: explanation and elaboration. *J Clin Epidemiol.* 2009; 62:e1–34.
  31. Higgins JP, Altman DG, Gøtzsche PC, Jüni P, Moher D, Oxman AD, Savovic J, Schulz KF, Weeks L, Sterne JA, Cochrane Bias Methods G, Cochrane Statistical Methods G, and Cochrane Bias Methods Group, and Cochrane Statistical Methods Group. The Cochrane Collaboration’s tool for assessing risk of bias in randomised trials. *BMJ.* 2011; 343:d5928.
  32. DerSimonian R, Laird N. Meta-analysis in clinical trials. *Control Clin Trials.* 1986; 7:177–88.
  33. Higgins JP, Thompson SG. Quantifying heterogeneity in a meta-analysis. *Stat Med.* 2002; 21:1539–58.
  34. Egger M, Davey Smith G, Schneider M, Minder C. Bias in meta-analysis detected by a simple, graphical test. *BMJ.* 1997; 315:629–34.

35. Duval S, Tweedie R. Trim and fill: A simple funnel-plot-based method of testing and adjusting for publication bias in meta-analysis. *Biometrics*. 2000; 56:455–63.
